# Supplementary material for: Transcript Profiling Reveals Auxin and Cytokinin Signaling Pathways and Transcription Regulation during In Vitro Organogenesis of Ramie (Boehmeria nivea L. Gaud)
Source: PLoS One. 2014 Nov 21;9(11):e113768. doi: 10.1371/journal.pone.0113768 (PMC4240604; doi:10.1371/journal.pone.0113768)
Supplement: Table S6 — List and categories of putative transcription factors. (XLSX) [file pone.0113768.s009.xlsx]

## Sheet: Sheet1
gene ID	TF family	Nr_ID	Nr_eValue	Nr_description
comp76333_c0	PHD(zinc finger)	XP_002515671.1	8.92e-50	phd finger protein, putative [Ricinus communis] >gi|223545214|gb|EEF46723.1| phd finger protein, putative [Ricinus communis]
comp31767_c5	PHD(zinc finger)	BAD82577.1	1.5e-14	PHD finger protein-like [Oryza sativa Japonica Group] >gi|125572880|gb|EAZ14395.1| hypothetical protein OsJ_04314 [Oryza sativa Japonica Group]
comp3548_c0	AP2/ERF	XP_002326164.1	2.76e-23	AP2 domain-containing transcription factor [Populus trichocarpa] >gi|222833357|gb|EEE71834.1| AP2 domain-containing transcription factor [Populus trichocarpa]
comp36493_c1	AP2/ERF	XP_003635541.1	2.46e-156	PREDICTED: AP2-like ethylene-responsive transcription factor AIL6-like [Vitis vinifera]
comp36493_c0	AP2/ERF	XP_003635541.1	8.85e-28	PREDICTED: AP2-like ethylene-responsive transcription factor AIL6-like [Vitis vinifera]
comp31894_c2	AP2/ERF	XP_002263597.2	0	PREDICTED: AP2-like ethylene-responsive transcription factor ANT-like [Vitis vinifera]
comp11752_c0	AP2/ERF	ADE41142.1	4.81e-07	AP2 domain class transcription factor [Malus x domestica]
comp30476_c1	AP2/ERF	ADE41114.1	1.07e-51	AP2 domain class transcription factor [Malus x domestica]
comp25131_c0	AP2/ERF	XP_003541472.1	1.7e-95	PREDICTED: AP2-like ethylene-responsive transcription factor AIL5-like [Glycine max]
comp3519_c0	AP2/ERF	XP_002306897.1	2.94e-09	AP2/ERF domain-containing transcription factor [Populus trichocarpa] >gi|222856346|gb|EEE93893.1| AP2/ERF domain-containing transcription factor [Populus trichocarpa]
comp20709_c1	AP2/ERF	BAG50065.1	1.05e-10	transcription factor AP2-EREBP [Lotus japonicus]
comp20709_c0	AP2/ERF	XP_002301490.1	2.15e-24	AP2/ERF domain-containing transcription factor [Populus trichocarpa] >gi|222843216|gb|EEE80763.1| AP2/ERF domain-containing transcription factor [Populus trichocarpa]
comp27876_c0	AP2/ERF	ABP35567.1	5.22e-13	ERF transcription factor [Solanum tuberosum]
comp25454_c0	AP2/ERF	XP_002298066.1	1.49e-33	AP2/ERF domain-containing transcription factor [Populus trichocarpa] >gi|222845324|gb|EEE82871.1| AP2/ERF domain-containing transcription factor [Populus trichocarpa]
comp32082_c0	AP2/ERF	XP_002304554.1	2.64e-77	AP2/ERF domain-containing transcription factor [Populus trichocarpa] >gi|222841986|gb|EEE79533.1| AP2/ERF domain-containing transcription factor [Populus trichocarpa]
comp26408_c0	AP2/ERF	NP_001241150.1	3.82e-49	ethylene-responsive transcription factor 5-like [Glycine max] >gi|300487923|gb|ADK22067.1| ERF protein [Glycine max]
comp29827_c0	AP2/ERF	XP_002332695.1	6.57e-49	AP2/ERF domain-containing transcription factor [Populus trichocarpa] >gi|222832949|gb|EEE71426.1| AP2/ERF domain-containing transcription factor [Populus trichocarpa]
comp31963_c1	AP2/ERF	BAI52953.1	8.93e-40	ethylene responsive transcription factor 1a [Citrullus lanatus subsp. vulgaris]
comp27117_c0	AP2/ERF	ACJ26758.1	2.89e-21	AP2 domain CBF protein [Solanum tuberosum]
comp25803_c1	AP2/ERF	XP_002533832.1	6.88e-19	AP2 domain transcription factor RAP2.3, putative [Ricinus communis] >gi|223526224|gb|EEF28546.1| AP2 domain transcription factor RAP2.3, putative [Ricinus communis]
comp31963_c0	AP2/ERF	ACY74382.1	6.45e-27	ERF2 transcription factor [Brassica carinata]
comp20761_c0	AP2/ERF	XP_003593630.1	1.94e-12	Ethylene-responsive transcription factor [Medicago truncatula] >gi|355482678|gb|AES63881.1| Ethylene-responsive transcription factor [Medicago truncatula] >gi|388499392|gb|AFK37762.1| unknown [Medicago truncatula]
comp36463_c1	AP2/ERF	XP_002311438.1	4.94e-131	AP2 domain-containing transcription factor [Populus trichocarpa] >gi|222851258|gb|EEE88805.1| AP2 domain-containing transcription factor [Populus trichocarpa]
comp32218_c0	AP2/ERF	XP_002326298.1	1.17e-66	AP2/ERF domain-containing transcription factor [Populus trichocarpa] >gi|148372128|gb|ABQ62995.1| RAP2-like protein [Populus trichocarpa] >gi|222833491|gb|EEE71968.1| AP2/ERF domain-containing transcription factor [Populus trichocarpa]
comp28609_c0	AP2/ERF	XP_002281947.1	2.95e-20	PREDICTED: ethylene-responsive transcription factor 5-like [Vitis vinifera]
comp28275_c0	AP2/ERF	XP_002318846.1	8.93e-77	AP2/ERF domain-containing transcription factor [Populus trichocarpa] >gi|222859519|gb|EEE97066.1| AP2/ERF domain-containing transcription factor [Populus trichocarpa]
comp37819_c4	AP2/ERF	XP_002280043.1	3.88e-41	PREDICTED: ethylene-responsive transcription factor ERF025-like [Vitis vinifera]
comp33395_c0	AP2/ERF	ADE41100.1	3.5e-46	AP2 domain class transcription factor [Malus x domestica]
comp32001_c2	ARF	ADL36577.1	0	ARF domain class transcription factor [Malus x domestica]
comp35067_c0	ARF	XP_002510508.1	0	Auxin response factor, putative [Ricinus communis] >gi|223551209|gb|EEF52695.1| Auxin response factor, putative [Ricinus communis]
comp30758_c1	ARF	AFP54302.1	2.71e-90	ARF domain class transcription factor [Pyrus x bretschneideri]
comp33311_c0	ARF	XP_002282437.1	0	PREDICTED: auxin response factor 18-like [Vitis vinifera]
comp36418_c1	ARF	XP_002528346.1	1.12e-18	Auxin-responsive protein IAA13, putative [Ricinus communis] >gi|223532214|gb|EEF34018.1| Auxin-responsive protein IAA13, putative [Ricinus communis]
comp36418_c3	ARF	XP_002269922.2	3.4e-60	PREDICTED: auxin-responsive protein IAA11-like [Vitis vinifera]
comp31401_c1	ARF	XP_002526369.1	0	Auxin response factor, putative [Ricinus communis] >gi|223534328|gb|EEF36040.1| Auxin response factor, putative [Ricinus communis]
comp28931_c0	ARF	ADL36579.1	1.13e-87	ARF domain class transcription factor [Malus x domestica]
comp31295_c0	LBD	XP_003552728.1	1.78e-93	PREDICTED: LOB domain-containing protein 41-like [Glycine max]
comp30988_c0	LBD	XP_002264049.2	1.61e-40	PREDICTED: LOB domain-containing protein 4-like [Vitis vinifera] >gi|147845397|emb|CAN83356.1| hypothetical protein VITISV_026098 [Vitis vinifera] >gi|296082729|emb|CBI21734.3| unnamed protein product [Vitis vinifera]
comp33631_c1	LBD	XP_003607861.1	4.1e-66	LOB domain-containing protein [Medicago truncatula] >gi|355508916|gb|AES90058.1| LOB domain-containing protein [Medicago truncatula]
comp27395_c0	LBD	XP_003556215.1	3.96e-69	PREDICTED: LOB domain-containing protein 1-like [Glycine max]
comp37137_c1	LBD	XP_002264010.1	9.04e-17	PREDICTED: LOB domain-containing protein 38 [Vitis vinifera]
comp22653_c1	AUX/IAA	AAY34918.1	2.1e-17	auxin-induced protein, partial [Prunus armeniaca]
comp22653_c0	AUX/IAA	XP_002517528.1	1.33e-45	Auxin-induced protein AUX22, putative [Ricinus communis] >gi|223543160|gb|EEF44692.1| Auxin-induced protein AUX22, putative [Ricinus communis]
comp29571_c1	AUX/IAA	XP_002515959.1	1.7e-52	Auxin-responsive protein IAA6, putative [Ricinus communis] >gi|223544864|gb|EEF46379.1| Auxin-responsive protein IAA6, putative [Ricinus communis]
comp25059_c0	AUX/IAA	ABG81096.1	1.4e-81	AUX/IAA-like protein [Pelargonium x hortorum]
comp31086_c0	AUX/IAA	XP_002531288.1	1.5e-112	Auxin-responsive protein IAA16, putative [Ricinus communis] >gi|223529121|gb|EEF31101.1| Auxin-responsive protein IAA16, putative [Ricinus communis]
comp35932_c0	AUX/IAA	AAL92850.1	1.48e-165	Aux/IAA protein [Vitis vinifera]
comp105855_c0	ABI3	XP_003622666.1	3.79e-43	B3 domain-containing protein [Medicago truncatula] >gi|355497681|gb|AES78884.1| B3 domain-containing protein [Medicago truncatula]
comp34383_c0	ABI3	XP_003516780.1	1.52e-125	PREDICTED: B3 domain-containing protein Os01g0234100-like [Glycine max]
comp37415_c2	ABI3	XP_003523918.1	4.67e-97	PREDICTED: B3 domain-containing protein At5g42700-like [Glycine max]
comp36776_c2	ABI3	XP_003545844.1	0	PREDICTED: B3 domain-containing protein Os07g0563300-like [Glycine max]
comp30694_c0	bHLH	ACN21647.1	1.98e-64	putative basic helix-loop-helix protein BHLH21 [Lotus japonicus]
comp29687_c0	bHLH	AAM10933.1	4.63e-33	putative bHLH transcription factor [Arabidopsis thaliana]
comp27795_c0	bHLH	XP_003517154.1	2.57e-108	PREDICTED: transcription factor bHLH93-like [Glycine max]
comp27679_c0	bHLH	XP_002271141.1	7.06e-07	PREDICTED: transcription factor bHLH120 [Vitis vinifera] >gi|296084088|emb|CBI24476.3| unnamed protein product [Vitis vinifera]
comp16328_c0	bHLH	CBI25069.3	2.92e-142	unnamed protein product [Vitis vinifera]
comp31948_c1	bHLH	AFH68208.1	2.61e-89	transcription factor bHLH [Vitis amurensis] >gi|384157483|gb|AFH68209.1| transcription factor bHLH [Vitis amurensis]
comp37308_c0	bHLH	XP_002273163.2	0	PREDICTED: uncharacterized basic helix-loop-helix protein At1g64625-like [Vitis vinifera]
comp28752_c1	bHLH	ACN21650.1	3.4e-81	putative basic helix-loop-helix protein BHLH25 [Lotus japonicus]
comp34475_c0	bHLH	XP_003530140.1	6.66e-21	PREDICTED: transcription factor bHLH68-like [Glycine max]
comp21910_c0	bHLH	ADK56282.1	4.4e-12	bHLH1 transcription factor [Brassica oleracea var. capitata]
comp34475_c1	bHLH	XP_003530140.1	2.19e-50	PREDICTED: transcription factor bHLH68-like [Glycine max]
comp34054_c0	bHLH	XP_003541039.1	7.48e-100	PREDICTED: transcription factor bHLH123-like [Glycine max]
comp17743_c0	bHLH	XP_003529377.1	2.44e-38	PREDICTED: transcription factor bHLH113-like [Glycine max]
comp31083_c1	bHLH	XP_002284113.1	2.2e-33	PREDICTED: transcription factor bHLH63-like [Vitis vinifera]
comp31083_c0	bHLH	XP_002284113.1	1.1e-99	PREDICTED: transcription factor bHLH63-like [Vitis vinifera]
comp33602_c0	bHLH	XP_002284231.1	1.08e-32	PREDICTED: transcription factor bHLH92 [Vitis vinifera]
comp36210_c0	bHLH	XP_003521193.1	2.53e-127	PREDICTED: transcription factor bHLH48-like [Glycine max]
comp33792_c0	bHLH	XP_002264409.1	0	PREDICTED: transcription factor bHLH13 [Vitis vinifera]
comp41051_c0	bHLH	XP_002279412.1	8.78e-37	PREDICTED: transcription factor bHLH75 [Vitis vinifera]
comp29763_c0	bHLH	ACO53628.1	0	bHLH domain protein [Gossypium hirsutum]
comp28557_c1	bHLH	ACN21646.1	8.02e-61	putative basic helix-loop-helix protein BHLH5 [Lotus japonicus] >gi|388495576|gb|AFK35854.1| unknown [Lotus japonicus]
comp115850_c0	bZIP	AFO63284.1	1.79e-29	bZIP5 [Tamarix hispida]
comp37732_c0	bZIP	XP_003630050.1	1.8e-143	BZIP transcription factor bZIP133 [Medicago truncatula] >gi|355524072|gb|AET04526.1| BZIP transcription factor bZIP133 [Medicago truncatula]
comp32887_c0	bZIP	NP_173381.1	1.2e-47	bZIP transcription factor-like protein [Arabidopsis thaliana] >gi|20466818|gb|AAM20726.1| unknown protein [Arabidopsis thaliana] >gi|23198222|gb|AAN15638.1| unknown protein [Arabidopsis thaliana] >gi|332191739|gb|AEE29860.1| bZIP transcription factor-like protein [Arabidopsis thaliana]
comp28923_c0	bZIP	AGA20434.1	1.25e-48	bZIP protein [Nelumbo nucifera]
comp28923_c1	bZIP	NP_001030998.1	6.48e-179	bZIP transcription factor-like protein [Arabidopsis thaliana] >gi|62321732|dbj|BAD95356.1| bZip protein AtbZip21 [Arabidopsis thaliana] >gi|332190155|gb|AEE28276.1| bZIP transcription factor-like protein [Arabidopsis thaliana]
comp32605_c3	bZIP	ABN58425.1	8.38e-91	abscisic acid responsive elements-binding protein 2 [Populus trichocarpa] >gi|125863278|gb|ABN58426.1| abscisic acid responsive elements-binding protein 2 [Populus trichocarpa]
comp32605_c1	bZIP	AAQ14866.1	2.07e-34	transcription factor BZIP1 [Catharanthus roseus]
comp30428_c2	bZIP	CBY88800.1	5.76e-31	basic-leucine zipper [Humulus lupulus]
comp20807_c0	bZIP	ADL36615.1	3.37e-56	BZIP domain class transcription factor [Malus x domestica]
comp27560_c0	Dof(zinc finger)	ADL36681.1	2.05e-28	DOF domain class transcription factor [Malus x domestica]
comp27560_c1	Dof(zinc finger)	ADL36681.1	5.14e-26	DOF domain class transcription factor [Malus x domestica]
comp27560_c2	Dof(zinc finger)	ADL36681.1	4.13e-32	DOF domain class transcription factor [Malus x domestica]
comp25331_c1	Dof(zinc finger)	XP_002283706.1	5.88e-50	PREDICTED: dof zinc finger protein DOF5.2-like [Vitis vinifera]
comp25331_c0	Dof(zinc finger)	XP_002269461.2	8.43e-118	PREDICTED: dof zinc finger protein DOF5.2-like [Vitis vinifera]
comp22443_c0	Dof(zinc finger)	XP_002262622.1	1.36e-08	PREDICTED: dof zinc finger protein DOF3.5-like [Vitis vinifera]
comp29210_c0	Dof(zinc finger)	XP_002281144.1	2.99e-17	PREDICTED: dof zinc finger protein DOF3.6-like [Vitis vinifera]
comp34131_c0	Dof(zinc finger)	XP_002278642.1	8.35e-08	PREDICTED: dof zinc finger protein DOF3.6 [Vitis vinifera]
comp24927_c0	Dof(zinc finger)	NP_001236850.1	4.69e-09	Dof26 [Glycine max] >gi|112363408|gb|ABI16028.1| Dof26 [Glycine max]
comp29238_c0	Dof(zinc finger)	XP_003602157.1	1.71e-23	Dof zinc finger protein [Medicago truncatula] >gi|355491205|gb|AES72408.1| Dof zinc finger protein [Medicago truncatula]
comp38882_c0	C2H2(zinc finger)	ADL36635.1	1.05e-30	C2H2L domain class transcription factor [Malus x domestica]
comp31979_c0	C2H2(zinc finger)	XP_003607708.1	0	C2H2 zinc finger protein [Medicago truncatula] >gi|358345288|ref|XP_003636713.1| C2H2 zinc finger protein [Medicago truncatula] >gi|355502648|gb|AES83851.1| C2H2 zinc finger protein [Medicago truncatula] >gi|355508763|gb|AES89905.1| C2H2 zinc finger protein [Medicago truncatula]
comp23806_c0	C2H2(zinc finger)	ACH59413.1	4.74e-08	C2H2 type zinc finger family protein [Pseudotsuga menziesii] >gi|197306134|gb|ACH59418.1| C2H2 type zinc finger family protein [Pseudotsuga menziesii] >gi|197306136|gb|ACH59419.1| C2H2 type zinc finger family protein [Pseudotsuga menziesii] >gi|197306138|gb|ACH59420.1| C2H2 type zinc finger family protein [Pseudotsuga menziesii] >gi|197306142|gb|ACH59422.1| C2H2 type zinc finger family protein [P…
comp23930_c0	C2H2(zinc finger)	NP_191326.1	1.96e-39	C2H2-type zinc finger protein [Arabidopsis thaliana] >gi|18027012|gb|AAL55722.1|AF254447_1 WIP2 protein [Arabidopsis thaliana] >gi|4678280|emb|CAB41188.1| zinc finger-like protein [Arabidopsis thaliana] >gi|59958298|gb|AAX12859.1| At3g57670 [Arabidopsis thaliana] >gi|332646164|gb|AEE79685.1| C2H2-type zinc finger protein [Arabidopsis thaliana]
comp25923_c0	C2H2(zinc finger)	ADL36622.1	6.71e-19	C2H2L domain class transcription factor [Malus x domestica]
comp34702_c0	C2H2(zinc finger)	ADL36647.1	1.11e-36	C2H2L domain class transcription factor [Malus x domestica]
comp27555_c0	C2H2(zinc finger)	ADL36643.1	2.16e-51	C2H2L domain class transcription factor [Malus x domestica]
comp25923_c1	C2H2(zinc finger)	ADL36622.1	9.54e-59	C2H2L domain class transcription factor [Malus x domestica]
comp29706_c0	C2H2(zinc finger)	AEY76110.1	1.12e-32	Cys2/His2-type zinc finger protein [Chrysanthemum x morifolium]
comp35593_c0	C2H2(zinc finger)	ADL36634.1	1.82e-74	C2H2L domain class transcription factor [Malus x domestica]
comp28602_c0	C2H2(zinc finger)	ADL36628.1	2.31e-45	C2H2L domain class transcription factor [Malus x domestica]
comp35237_c1	C2H2(zinc finger)	BAG50058.1	9.62e-50	transcription factor C2H2 [Lotus japonicus]
comp31180_c0	C3H(zinc finger)	XP_003611785.1	1.24e-24	Zinc finger CCCH domain-containing protein [Medicago truncatula] >gi|355513120|gb|AES94743.1| Zinc finger CCCH domain-containing protein [Medicago truncatula]
comp37023_c0	C3H(zinc finger)	XP_002269430.1	0	PREDICTED: zinc finger CCCH domain-containing protein 29-like [Vitis vinifera]
comp36409_c0	CAMTA	XP_003595227.1	0	Calmodulin-binding protein [Medicago truncatula] >gi|355484275|gb|AES65478.1| Calmodulin-binding protein [Medicago truncatula]
comp37098_c0	CAMTA	XP_003629729.1	0	Calmodulin binding protein [Medicago truncatula] >gi|355523751|gb|AET04205.1| Calmodulin binding protein [Medicago truncatula]
comp36181_c0	CAMTA	XP_002516086.1	0	calmodulin binding protein, putative [Ricinus communis] >gi|223544572|gb|EEF46088.1| calmodulin binding protein, putative [Ricinus communis]
comp159346_c0	CCAAT	XP_002528664.1	2.9e-41	ccaat-binding transcription factor subunit A, putative [Ricinus communis] >gi|223531887|gb|EEF33703.1| ccaat-binding transcription factor subunit A, putative [Ricinus communis]
comp28990_c0	E2F	NP_851012.1	1.17e-84	protein DP-E2F-like 1 [Arabidopsis thaliana] >gi|19578315|emb|CAD10633.1| transcription factor E2Fe [Arabidopsis thaliana] >gi|332644853|gb|AEE78374.1| protein DP-E2F-like 1 [Arabidopsis thaliana]
comp32223_c0	E2F	XP_002281897.1	7.59e-137	PREDICTED: E2F transcription factor-like E2FE [Vitis vinifera] >gi|296087763|emb|CBI35019.3| unnamed protein product [Vitis vinifera]
comp36453_c1	FHA	NP_564445.1	1.62e-74	forkhead-associated (FHA) domain-containing protein [Arabidopsis thaliana] >gi|212283380|gb|ACJ23185.1| parallel spindle 1 [Arabidopsis thaliana] >gi|332193580|gb|AEE31701.1| forkhead-associated (FHA) domain-containing protein [Arabidopsis thaliana]
comp22236_c0	GATA(zinc finger)	XP_003530174.1	3.23e-47	PREDICTED: GATA transcription factor 2-like [Glycine max]
comp35580_c0	GRAS	AFH54533.1	2.97e-28	GRAS family protein, partial [Dimocarpus longan]
comp28473_c0	GRAS	XP_002326418.1	1.02e-23	GRAS family transcription factor [Populus trichocarpa] >gi|222833611|gb|EEE72088.1| GRAS family transcription factor [Populus trichocarpa]
comp23720_c0	GRAS	XP_002322227.1	4.27e-95	GRAS family transcription factor [Populus trichocarpa] >gi|222869223|gb|EEF06354.1| GRAS family transcription factor [Populus trichocarpa]
comp28473_c2	GRAS	XP_002323112.1	0	GRAS family transcription factor [Populus trichocarpa] >gi|222867742|gb|EEF04873.1| GRAS family transcription factor [Populus trichocarpa]
comp33492_c3	GRAS	XP_002534030.1	0	DELLA protein GAI, putative [Ricinus communis] >gi|223525955|gb|EEF28350.1| DELLA protein GAI, putative [Ricinus communis]
comp35171_c0	GRAS	XP_002272334.1	0	PREDICTED: scarecrow-like transcription factor PAT1-like [Vitis vinifera]
comp32835_c1	GRAS	ADL36821.1	0	SCL domain class transcription factor [Malus x domestica]
comp35368_c0	GRAS	ADL36815.1	0	SCL domain class transcription factor [Malus x domestica]
comp33407_c1	GRAS	XP_002319796.1	0	GRAS family transcription factor [Populus trichocarpa] >gi|222858172|gb|EEE95719.1| GRAS family transcription factor [Populus trichocarpa]
comp23305_c0	GRF	XP_003602338.1	3.17e-32	Growth-regulating factor [Medicago truncatula] >gi|355491386|gb|AES72589.1| Growth-regulating factor [Medicago truncatula]
comp16323_c0	GRF	ADL36702.1	3.05e-33	GRF domain class transcription factor [Malus x domestica]
comp26467_c0	GRF	ADL36702.1	1.67e-22	GRF domain class transcription factor [Malus x domestica]
comp33518_c0	HMG	XP_003592799.1	5.15e-08	High mobility group protein B3 [Medicago truncatula] >gi|355481847|gb|AES63050.1| High mobility group protein B3 [Medicago truncatula]
comp30688_c0	HMG	NP_194111.1	1.4e-99	HMG (high mobility group) box protein [Arabidopsis thaliana] >gi|75266376|sp|Q9SUP7.1|HMGB6_ARATH RecName: Full=High mobility group B protein 6; AltName: Full=Nucleosome/chromatin assembly factor group D 06; Short=Nucleosome/chromatin assembly factor group D 6; AltName: Full=WRKY transcription factor 53; Short=AtWRKY53; Short=WRKY DNA-binding protein 53 >gi|4454049|emb|CAA23046.1| 98b like protei…
comp1310_c0	HB	XP_003536477.1	2.37e-163	PREDICTED: homeobox-leucine zipper protein ANTHOCYANINLESS 2-like [Glycine max]
comp23624_c1	HB	XP_003534596.1	1.07e-119	PREDICTED: homeobox-leucine zipper protein ANTHOCYANINLESS 2-like [Glycine max]
comp25578_c0	HB	XP_002510028.1	2.93e-42	homeobox protein, putative [Ricinus communis] >gi|223550729|gb|EEF52215.1| homeobox protein, putative [Ricinus communis]
comp29201_c0	HB	XP_002277673.1	0	PREDICTED: homeobox-leucine zipper protein ROC3 [Vitis vinifera] >gi|147777871|emb|CAN60291.1| hypothetical protein VITISV_032685 [Vitis vinifera] >gi|297742043|emb|CBI33830.3| unnamed protein product [Vitis vinifera]
comp135433_c0	HB	XP_002273463.1	2.11e-37	PREDICTED: homeobox-leucine zipper protein ATHB-52 [Vitis vinifera] >gi|147785778|emb|CAN64250.1| hypothetical protein VITISV_002432 [Vitis vinifera]
comp29408_c1	HB	XP_002280649.2	1.98e-06	PREDICTED: homeobox-leucine zipper protein HOX3-like [Vitis vinifera]
comp30387_c2	HB	AAK84886.1	3e-76	homeodomain leucine zipper protein HDZ2 [Phaseolus vulgaris]
comp29408_c0	HB	XP_002526019.1	1.64e-83	homeobox protein, putative [Ricinus communis] >gi|223534666|gb|EEF36359.1| homeobox protein, putative [Ricinus communis]
comp34085_c0	HB	XP_003543387.1	3.27e-37	PREDICTED: homeobox-leucine zipper protein HDG2-like [Glycine max]
comp29016_c1	HB	XP_003633842.1	1.26e-40	PREDICTED: homeobox-leucine zipper protein HOX21-like [Vitis vinifera]
comp34085_c1	HB	XP_002524172.1	0	homeobox protein, putative [Ricinus communis] >gi|223536541|gb|EEF38187.1| homeobox protein, putative [Ricinus communis]
comp33899_c0	HB	XP_002272264.2	0	PREDICTED: homeobox-leucine zipper protein ANTHOCYANINLESS 2 [Vitis vinifera]
comp31167_c0	HB	XP_003524258.1	6.69e-31	PREDICTED: homeobox-leucine zipper protein ATHB-16-like, partial [Glycine max]
comp31687_c0	HB	XP_002278872.1	1.31e-115	PREDICTED: homeobox-leucine zipper protein HAT5-like [Vitis vinifera]
comp38014_c2	HB	XP_002520111.1	1.36e-08	homeobox protein, putative [Ricinus communis] >gi|223540603|gb|EEF42166.1| homeobox protein, putative [Ricinus communis]
comp38014_c0	HB	XP_002520111.1	3.7e-120	homeobox protein, putative [Ricinus communis] >gi|223540603|gb|EEF42166.1| homeobox protein, putative [Ricinus communis]
comp34015_c0	HSF	XP_003637389.1	4.73e-75	Heat stress transcription factor A-2c [Medicago truncatula] >gi|355503324|gb|AES84527.1| Heat stress transcription factor A-2c [Medicago truncatula]
comp34319_c0	HSF	XP_003541290.1	1.69e-111	PREDICTED: heat stress transcription factor A-2-like [Glycine max]
comp36487_c0	HSF	ADL36730.1	1.04e-107	HSF domain class transcription factor [Malus x domestica]
comp30651_c0	JUMONJI	NP_566667.1	4.93e-104	transcription factor jumonji (jmjC) domain-containing protein [Arabidopsis thaliana] >gi|9294408|dbj|BAB02489.1| unnamed protein product [Arabidopsis thaliana] >gi|21536708|gb|AAM61040.1| unknown [Arabidopsis thaliana] >gi|332642905|gb|AEE76426.1| transcription factor jumonji (jmjC) domain-containing protein [Arabidopsis thaliana]
comp34209_c0	JUMONJI	XP_002326545.1	0	jumonji domain protein [Populus trichocarpa] >gi|222833867|gb|EEE72344.1| jumonji domain protein [Populus trichocarpa]
comp36987_c2	LIM	XP_002524923.1	0	LIM domain kinase, putative [Ricinus communis] >gi|223535758|gb|EEF37420.1| LIM domain kinase, putative [Ricinus communis]
comp20616_c0	LIM	NP_001056985.1	0	Os06g0182500 [Oryza sativa Japonica Group] >gi|55771369|dbj|BAD72536.1| LIM domain containing protein-like [Oryza sativa Japonica Group] >gi|113595025|dbj|BAF18899.1| Os06g0182500 [Oryza sativa Japonica Group]
comp37014_c0	LUG	XP_003595690.1	0	WD repeat-containing protein [Medicago truncatula] >gi|355484738|gb|AES65941.1| WD repeat-containing protein [Medicago truncatula]
comp25978_c0	LUG	XP_002527721.1	6.79e-137	WD-repeat protein, putative [Ricinus communis] >gi|223532862|gb|EEF34634.1| WD-repeat protein, putative [Ricinus communis]
comp28168_c0	LUG	XP_002514368.1	3.84e-121	WD-repeat protein, putative [Ricinus communis] >gi|223546824|gb|EEF48322.1| WD-repeat protein, putative [Ricinus communis]
comp29453_c0	MADS	XP_003597147.1	4.69e-17	MADS-box transcription factor [Medicago truncatula] >gi|355486195|gb|AES67398.1| MADS-box transcription factor [Medicago truncatula]
comp27235_c0	MADS	NP_001236130.1	4.94e-135	MADS domain transporter AGL11 [Glycine max] >gi|87138095|gb|ABD28284.1| MADS domain transporter AGL11 [Glycine max]
comp20560_c0	MADS	XP_002527350.1	1.9e-107	mads box protein, putative [Ricinus communis] >gi|223533269|gb|EEF35022.1| mads box protein, putative [Ricinus communis]
comp27903_c0	MADS	AEU08497.1	4.84e-115	MADS1 [Corylus heterophylla]
comp28552_c0	MADS	XP_002527350.1	1.87e-131	mads box protein, putative [Ricinus communis] >gi|223533269|gb|EEF35022.1| mads box protein, putative [Ricinus communis]
comp18778_c0	MADS	XP_002278239.1	2.32e-68	PREDICTED: MADS-box transcription factor 26 [Vitis vinifera] >gi|296089407|emb|CBI39226.3| unnamed protein product [Vitis vinifera]
comp33115_c1	MADS	AAK21256.1	4.68e-54	MADS-box transcription factor FBP25 [Petunia x hybrida]
comp29340_c0	MADS	XP_002265503.1	5.53e-20	PREDICTED: MADS-box transcription factor 27 [Vitis vinifera]
comp27410_c1	MYB	XP_002278098.1	1.1e-62	PREDICTED: myb-related protein 305 [Vitis vinifera] >gi|298204457|emb|CBI16937.3| unnamed protein product [Vitis vinifera]
comp12805_c0	MYB	XP_003542045.1	1.53e-10	PREDICTED: transcription factor MYB46-like [Glycine max]
comp11594_c0	MYB	ABH02884.1	2.17e-38	MYB transcription factor MYB164 [Glycine max]
comp135529_c0	MYB	ABB84757.1	1.77e-78	MYB9 [Malus x domestica]
comp32204_c1	MYB	AFP65734.1	8.42e-72	R2R3 MYB, partial [Iris fulva]
comp26140_c0	MYB	AFM75823.1	6.16e-73	MYB4 [Malus hybrid cultivar]
comp11355_c0	MYB	ABH02906.1	2.77e-20	MYB transcription factor MYB161 [Glycine max]
comp29395_c0	MYB	XP_002265893.2	3.28e-73	PREDICTED: myb-related protein 305 [Vitis vinifera]
comp11224_c0	MYB	ABI84253.1	2.24e-47	transcription factor Myb1 [Arachis hypogaea]
comp29789_c0	MYB	AFI80887.1	5.74e-101	R2R3-MYB transcription factor MYB1.1 [Quercus suber] >gi|385843182|gb|AFI80888.1| R2R3-MYB transcription factor MYB1.2 [Quercus suber] >gi|385845759|gb|AFI81248.1| R2R3-MYB transcription factor MYB1.1 [Quercus suber]
comp11224_c1	MYB	ACZ54677.1	2.04e-20	myb transcription factor, partial [Prunus persica]
comp29399_c0	MYB	AFJ53047.1	2.03e-77	tannin-related R2R3 MYB transcription factor, partial [Trifolium affine]
comp16903_c0	MYB	AAZ20442.1	8.79e-110	MYB92 [Malus x domestica]
comp37187_c0	MYB	XP_002280843.2	0	PREDICTED: myb-related protein 3R-1-like [Vitis vinifera]
comp32829_c0	MYB	XP_002271033.2	2.09e-84	PREDICTED: myb-related protein 315-like [Vitis vinifera]
comp31761_c0	MYB	BAA88222.1	2.88e-70	myb-related transcription factor LBM2 [Nicotiana tabacum]
comp25830_c0	MYB	XP_003589673.1	1.83e-53	Myb family transcription factor APL [Medicago truncatula] >gi|355478721|gb|AES59924.1| Myb family transcription factor APL [Medicago truncatula]
comp35813_c1	MYB	NP_001235894.1	7.34e-65	MYB transcription factor MYB109 [Glycine max] >gi|356511607|ref|XP_003524515.1| PREDICTED: uncharacterized protein LOC100812196 [Glycine max] >gi|110931704|gb|ABH02851.1| MYB transcription factor MYB109 [Glycine max]
comp24965_c0	MYB	ACH87169.1	1.56e-121	MYB transcription factor [Camellia sinensis]
comp27458_c0	MYB	XP_002516567.1	0	myb, putative [Ricinus communis] >gi|223544387|gb|EEF45908.1| myb, putative [Ricinus communis]
comp28733_c0	MYB	XP_003589289.1	1.74e-56	Myb family transcription factor-like protein [Medicago truncatula] >gi|355478337|gb|AES59540.1| Myb family transcription factor-like protein [Medicago truncatula]
comp12481_c0	MYB	NP_001236066.1	2.19e-75	MYB transcription factor MYB177 [Glycine max] >gi|110931734|gb|ABH02866.1| MYB transcription factor MYB177 [Glycine max]
comp28735_c0	MYB	ABH02924.1	3.16e-63	MYB transcription factor MYB131 [Glycine max]
comp35735_c0	MYB	NP_001118567.1	4.25e-124	myb family transcription factor [Arabidopsis thaliana] >gi|6223653|gb|AAF05867.1|AC011698_18 transfactor-like [Arabidopsis thaliana] >gi|332640508|gb|AEE74029.1| myb family transcription factor [Arabidopsis thaliana]
comp29195_c1	MYB	NP_027544.1	2.89e-48	myb family transcription factor [Arabidopsis thaliana] >gi|16974544|gb|AAL31188.1| At2g03500/T4M8.7 [Arabidopsis thaliana] >gi|20197737|gb|AAD17450.2| expressed protein [Arabidopsis thaliana] >gi|22137230|gb|AAM91460.1| At2g03500/T4M8.7 [Arabidopsis thaliana] >gi|62320672|dbj|BAD95340.1| hypothetical protein [Arabidopsis thaliana] >gi|330250613|gb|AEC05707.1| myb family transcription factor [Arab…
comp32001_c4	MYB	CCA29105.1	6.46e-34	putative MYB transcription factor [Rosa rugosa]
comp34847_c0	MYB	CAI30890.1	5.67e-85	somatic embryogenesis MYB 1 transcription factor [Cucumis sativus]
comp31966_c0	MYB	XP_002272704.1	3.86e-68	PREDICTED: myb-related protein Myb4 [Vitis vinifera] >gi|296081257|emb|CBI18001.3| unnamed protein product [Vitis vinifera]
comp27021_c2	MYB	CAM58451.1	6.79e-51	myb factor [Humulus lupulus]
comp34265_c0	MYB	XP_003546831.1	2.69e-129	PREDICTED: myb family transcription factor APL-like [Glycine max]
comp31692_c0	MYB	XP_002284926.1	1.34e-101	PREDICTED: myb-related protein 306 [Vitis vinifera]
comp27021_c1	MYB	CAM58451.1	1.17e-36	myb factor [Humulus lupulus]
comp21729_c0	NAC	XP_002332095.1	1.7e-32	NAC domain protein, IPR003441 [Populus trichocarpa] >gi|222874915|gb|EEF12046.1| NAC domain protein, IPR003441 [Populus trichocarpa]
comp28207_c0	NAC	ADR00341.1	1.51e-102	wood-associated NAC domain transcription factor 6B [Populus trichocarpa] >gi|327397096|dbj|BAK14365.1| transcription factor [Populus trichocarpa]
comp31730_c0	NAC	XP_002313601.1	4.82e-101	NAC domain protein, IPR003441 [Populus trichocarpa] >gi|222850009|gb|EEE87556.1| NAC domain protein, IPR003441 [Populus trichocarpa]
comp29280_c0	NAC	XP_002300866.1	1.26e-97	NAC domain protein, IPR003441 [Populus trichocarpa] >gi|222842592|gb|EEE80139.1| NAC domain protein, IPR003441 [Populus trichocarpa]
comp1360_c0	NAC	XP_002323463.1	1.11e-41	NAC domain protein, IPR003441 [Populus trichocarpa] >gi|222868093|gb|EEF05224.1| NAC domain protein, IPR003441 [Populus trichocarpa]
comp23052_c0	NAC	XP_003528722.1	2.18e-111	PREDICTED: putative NAC domain-containing protein 94-like [Glycine max]
comp32525_c1	NAC	XP_003531051.1	1.22e-71	PREDICTED: NAC domain-containing protein 68-like [Glycine max]
comp35081_c1	NAC	XP_002298277.1	5.11e-74	NAC domain protein, IPR003441 [Populus trichocarpa] >gi|224149083|ref|XP_002336754.1| NAC domain protein, IPR003441 [Populus trichocarpa] >gi|222836661|gb|EEE75054.1| NAC domain protein, IPR003441 [Populus trichocarpa] >gi|222845535|gb|EEE83082.1| NAC domain protein, IPR003441 [Populus trichocarpa]
comp33742_c0	NAC	XP_002298652.1	6.15e-43	NAC domain protein, IPR003441 [Populus trichocarpa] >gi|222845910|gb|EEE83457.1| NAC domain protein, IPR003441 [Populus trichocarpa]
comp34323_c0	NAC	ADL36794.1	2.28e-110	NAC domain class transcription factor [Malus x domestica]
comp34474_c3	NAC	XP_002309945.1	5.21e-138	NAC domain protein, IPR003441 [Populus trichocarpa] >gi|222852848|gb|EEE90395.1| NAC domain protein, IPR003441 [Populus trichocarpa]
comp23144_c1	Nin-like	XP_002869079.1	1.27e-51	RWP-RK domain-containing protein [Arabidopsis lyrata subsp. lyrata] >gi|297314915|gb|EFH45338.1| RWP-RK domain-containing protein [Arabidopsis lyrata subsp. lyrata]
comp73105_c0	SET	XP_002312257.1	0	SET domain protein [Populus trichocarpa] >gi|222852077|gb|EEE89624.1| SET domain protein [Populus trichocarpa]
comp35853_c0	SET	XP_002325110.1	0	SET domain protein [Populus trichocarpa] >gi|222866544|gb|EEF03675.1| SET domain protein [Populus trichocarpa]
comp32178_c0	SET	XP_002301759.1	0	SET domain protein [Populus trichocarpa] >gi|222843485|gb|EEE81032.1| SET domain protein [Populus trichocarpa]
comp23094_c0	PLATZ	NP_191626.1	1.92e-74	PLATZ transcription factor family protein [Arabidopsis thaliana] >gi|7329677|emb|CAB82671.1| putative protein [Arabidopsis thaliana] >gi|56121894|gb|AAV74228.1| At3g60670 [Arabidopsis thaliana] >gi|57222190|gb|AAW39002.1| At3g60670 [Arabidopsis thaliana] >gi|332646574|gb|AEE80095.1| PLATZ transcription factor family protein [Arabidopsis thaliana]
comp31708_c0	TAZ(zinc finger)	XP_002270802.2	0	PREDICTED: BTB/POZ domain-containing protein At5g48130-like [Vitis vinifera]
comp28271_c0	TAZ(zinc finger)	XP_003591087.1	0	BTB/POZ domain-containing protein [Medicago truncatula] >gi|355480135|gb|AES61338.1| BTB/POZ domain-containing protein [Medicago truncatula]
comp11361_c0	TAZ(zinc finger)	XP_002273118.1	0	PREDICTED: BTB/POZ domain-containing protein At3g19850 [Vitis vinifera]
comp37376_c2	TAZ(zinc finger)	XP_002275454.1	0	PREDICTED: BTB/POZ domain-containing protein At3g50780 [Vitis vinifera] >gi|297735227|emb|CBI17589.3| unnamed protein product [Vitis vinifera]
comp35203_c0	TAZ(zinc finger)	XP_003552325.1	3.98e-128	PREDICTED: BTB/POZ domain-containing protein At3g08570-like [Glycine max]
comp34178_c1	TAZ(zinc finger)	XP_003635037.1	0	PREDICTED: BTB/POZ domain-containing protein At5g47800-like [Vitis vinifera] >gi|297736700|emb|CBI25736.3| unnamed protein product [Vitis vinifera]
comp35203_c1	TAZ(zinc finger)	XP_002269960.2	8.32e-102	PREDICTED: BTB/POZ domain-containing protein At3g08570-like isoform 1 [Vitis vinifera]
comp31727_c0	TAZ(zinc finger)	XP_002284345.1	0	PREDICTED: BTB/POZ domain-containing protein NPY2-like [Vitis vinifera]
comp34740_c0	TAZ(zinc finger)	XP_003631414.1	0	PREDICTED: BTB/POZ domain-containing protein At5g41330-like [Vitis vinifera]
comp32506_c1	TAZ(zinc finger)	AET34790.1	0	BTB/POZ ankyrin repeat protein [Pisum sativum] >gi|356650814|gb|AET34791.1| BTB/POZ ankyrin repeat protein [Pisum sativum]
comp37364_c2	TAZ(zinc finger)	XP_003549831.1	4.7e-146	PREDICTED: BTB/POZ and TAZ domain-containing protein 2-like [Glycine max]
comp27932_c0	TCP	XP_003552583.1	4.98e-47	PREDICTED: transcription factor TCP13-like [Glycine max]
comp37970_c1	TCP	BAJ07173.1	1.28e-75	MdTCP2A [Malus x domestica]
comp35764_c0	TLP	XP_002272047.2	3.76e-162	PREDICTED: tubby-like protein 8-like [Vitis vinifera] >gi|298204762|emb|CBI25260.3| unnamed protein product [Vitis vinifera]
comp32283_c1	Trihelix	XP_002277307.2	3.24e-133	PREDICTED: trihelix transcription factor GT-2-like [Vitis vinifera] >gi|297740072|emb|CBI30254.3| unnamed protein product [Vitis vinifera]
comp36270_c1	Trihelix	XP_003520836.1	1.48e-45	PREDICTED: trihelix transcription factor GTL2-like [Glycine max]
comp35493_c0	Trihelix	XP_002276933.1	2.38e-148	PREDICTED: trihelix transcription factor GT-2 [Vitis vinifera]
comp296550_c0	WRKY	XP_003621143.1	3.08e-11	WRKY transcription factor [Medicago truncatula] >gi|355496158|gb|AES77361.1| WRKY transcription factor [Medicago truncatula]
comp800_c0	WRKY	XP_002517481.1	1.34e-38	WRKY transcription factor, putative [Ricinus communis] >gi|223543492|gb|EEF45023.1| WRKY transcription factor, putative [Ricinus communis]
comp37097_c3	WRKY	AFK27602.1	1.75e-70	WRKY71 [Vitis amurensis]
comp29303_c1	WRKY	XP_002275978.1	4.36e-80	PREDICTED: WRKY transcription factor 44-like [Vitis vinifera]
comp36542_c5	WRKY	ADF45433.1	3.71e-54	WRKY1 [Hevea brasiliensis]
comp24192_c0	WRKY	XP_002511920.1	6.23e-06	WRKY transcription factor, putative [Ricinus communis] >gi|223549100|gb|EEF50589.1| WRKY transcription factor, putative [Ricinus communis]
comp26503_c1	WRKY	ACV92025.1	1.56e-66	WRKY transcription factor 23 [(Populus tomentosa x P. bolleana) x P. tomentosa]
comp27790_c0	WRKY	ADL36851.1	1.75e-31	WRKY domain class transcription factor [Malus x domestica]
comp35311_c0	WRKY	AAR92477.1	3.75e-108	putative WRKY transcription factor 30 [Vitis aestivalis]
comp32074_c0	WRKY	XP_002278221.1	3.97e-40	PREDICTED: WRKY transcription factor 22-like [Vitis vinifera]
comp17818_c0	WRKY	NP_001237777.1	1.58e-72	WRKY32 protein [Glycine max] >gi|151934189|gb|ABS18432.1| WRKY32 [Glycine max]
comp31252_c0	WRKY	ACV92007.1	2.88e-109	WRKY transcription factor 5 [(Populus tomentosa x P. bolleana) x P. tomentosa]
comp24946_c1	CO-like(zinc finger)	ACC95129.1	4.81e-36	COL1 [Beta vulgaris subsp. vulgaris]
comp31290_c0	CO-like(zinc finger)	ADL36674.1	3.34e-93	COL domain class transcription factor [Malus x domestica]
comp24946_c0	CO-like(zinc finger)	XP_002282509.1	7.88e-16	PREDICTED: zinc finger protein CONSTANS-LIKE 2-like [Vitis vinifera]
comp28279_c0	CO-like(zinc finger)	XP_003597068.1	1.29e-28	Zinc finger protein CONSTANS-like protein [Medicago truncatula] >gi|355486116|gb|AES67319.1| Zinc finger protein CONSTANS-like protein [Medicago truncatula]
comp20909_c0	CO-like(zinc finger)	XP_002277953.1	1.86e-34	PREDICTED: zinc finger protein CONSTANS-LIKE 5-like [Vitis vinifera]
comp35784_c3	CO-like(zinc finger)	NP_001239972.1	3.12e-31	zinc finger protein CONSTANS-LIKE 5-like [Glycine max] >gi|260513716|gb|ACX42570.1| CONSTANS-like zinc finger protein [Glycine max]
comp34702_c2	CO-like(zinc finger)	XP_002263613.1	7.18e-22	PREDICTED: zinc finger protein CONSTANS-LIKE 14-like [Vitis vinifera]
comp34544_c1	CO-like(zinc finger)	XP_002282578.1	4.86e-38	PREDICTED: zinc finger protein CONSTANS-LIKE 16 [Vitis vinifera] >gi|297737819|emb|CBI27020.3| unnamed protein product [Vitis vinifera]
comp34544_c0	CO-like(zinc finger)	XP_002282578.1	6.12e-16	PREDICTED: zinc finger protein CONSTANS-LIKE 16 [Vitis vinifera] >gi|297737819|emb|CBI27020.3| unnamed protein product [Vitis vinifera]
comp34544_c2	CO-like(zinc finger)	XP_002282578.1	1.23e-58	PREDICTED: zinc finger protein CONSTANS-LIKE 16 [Vitis vinifera] >gi|297737819|emb|CBI27020.3| unnamed protein product [Vitis vinifera]
